# Supplementary material
Source: publisher figshare collection journal article supplement (https://acs.figshare.com/ndownloader/files/25956225)
Supplement: Supplementary file 1 [file 25956225]

# ***Supporting information***

## **Insight into the effect of copper substitution on the catalytic performance of LaCoO<sub>3</sub>-based catalysts for direct epoxidation of propylene with molecular oxygen**

Jianyi Lei,<sup>a</sup> Jiajun Dai,<sup>a</sup> Kok Bing Tan,<sup>a</sup> Jiale Huang,<sup>a\*</sup> Guowu Zhan,<sup>b\*</sup> Qingbiao Li<sup>a,c</sup>

<sup>a</sup> *Department of Chemical and Biochemical Engineering, College of Chemistry and Chemical Engineering, and National Laboratory for Green Chemical Productions of Alcohols, Ethers and Esters, Xiamen University, Xiamen 361005, P. R. China*

<sup>b</sup> *College of Chemical Engineering, Huaqiao University, Xiamen 361021, P. R. China*

<sup>c</sup> *College of Food and Biology Engineering, Jimei University, Xiamen, Fujian 361021, P. R. China*

<sup>\*</sup>Corresponding authors

*E-mail address:* cola@xmu.edu.cn (J. Huang), gwzhan@hqu.edu.cn (G. Zhan).

Number of pages: 16

Number of figures: 9

Number of tables: 3

# Table of Contents

## Supporting Figures

|                                                                                                                                                                                                                                                                                                                                                                                               |    |
|-----------------------------------------------------------------------------------------------------------------------------------------------------------------------------------------------------------------------------------------------------------------------------------------------------------------------------------------------------------------------------------------------|----|
| Figure S1. The XRD patterns of different copper doping on $\text{LaCoO}_3$ .....                                                                                                                                                                                                                                                                                                              | 3  |
| Figure S2. The XRD patterns of different copper oxide loading on $\text{LaCoO}_3$ .....                                                                                                                                                                                                                                                                                                       | 4  |
| Figure S3. The XRD patterns of representative samples with and without NaCl modification.....                                                                                                                                                                                                                                                                                                 | 5  |
| Figure S4. (a) Representative TEM image and (b-c) corresponding EDX elemental maps of $\text{LaCo}_{0.8}\text{Cu}_{0.2}\text{O}_{3-\delta}$ -NaCl sample (Only describing La, Co, Cu, and O since NaCl is hardly to be detected after ultrasonic process for $\text{LaCo}_{0.8}\text{Cu}_{0.2}\text{O}_{3-\delta}$ sample promoted with NaCl. ....                                            | 6  |
| Figure S5. $\text{N}_2$ adsorption/desorption isotherms with insert of pore size distribution of representative samples.....                                                                                                                                                                                                                                                                  | 7  |
| Figure S6. Distribution of organic products over $\text{LaCo}_x\text{Cu}_{1-x}\text{O}_{3-\delta}$ catalysts and corresponding propylene conversion (all samples were modified with NaCl solution with a concentration of 0.0256 M).....                                                                                                                                                      | 8  |
| Figure S7. Distribution of organic products over $x\text{CuO}/\text{LaCoO}_3$ -yNaCl catalysts and corresponding propylene conversion (where x represents the nominal content (wt. %) of copper on the $\text{LaCoO}_3$ , y represents the mass ratio of NaCl to $x\text{CuO}/\text{LaCoO}_3$ used in NaCl solution, corresponding to 0.0128-0.0384 M).....                                   | 8  |
| Figure S8. XPS spectrum of Cl 2p for $\text{LaCoO}_3$ -based catalysts modified with NaCl, (1) fresh $5\text{CuO}/\text{LaCoO}_3$ -NaCl; (2) spent $5\text{CuO}/\text{LaCoO}_3$ -NaCl; (3) fresh $\text{LaCo}_{0.8}\text{Cu}_{0.2}\text{O}_{3-\delta}$ -NaCl; (4) fresh $\text{LaCo}_{0.8}\text{Cu}_{0.2}\text{O}_{3-\delta}$ -NaCl; The concentration of NaCl solution used is 0.0256 M..... | 9  |
| Figure S9. Distribution of organic products over different copper species supported on $\text{LaCoO}_3$ -NaCl catalysts and corresponding propylene conversion (The concentration of NaCl solution is 0.0256 M) .....                                                                                                                                                                         | 10 |

## Supporting Tables

|                                                                                                                                          |    |
|------------------------------------------------------------------------------------------------------------------------------------------|----|
| Table S1. Textural properties of the samples synthesized in this study and previously relevant reports for DEP reaction.....             | 11 |
| Table S2. Catalytic performance of the samples synthesized in this study and previous works on DEP reaction with molecular oxygen.. .... | 12 |
| Table S3. XPS data (chemical states) of all $\text{LaCoO}_3$ -based catalysts calculated by XPS spectra.....                             | 14 |

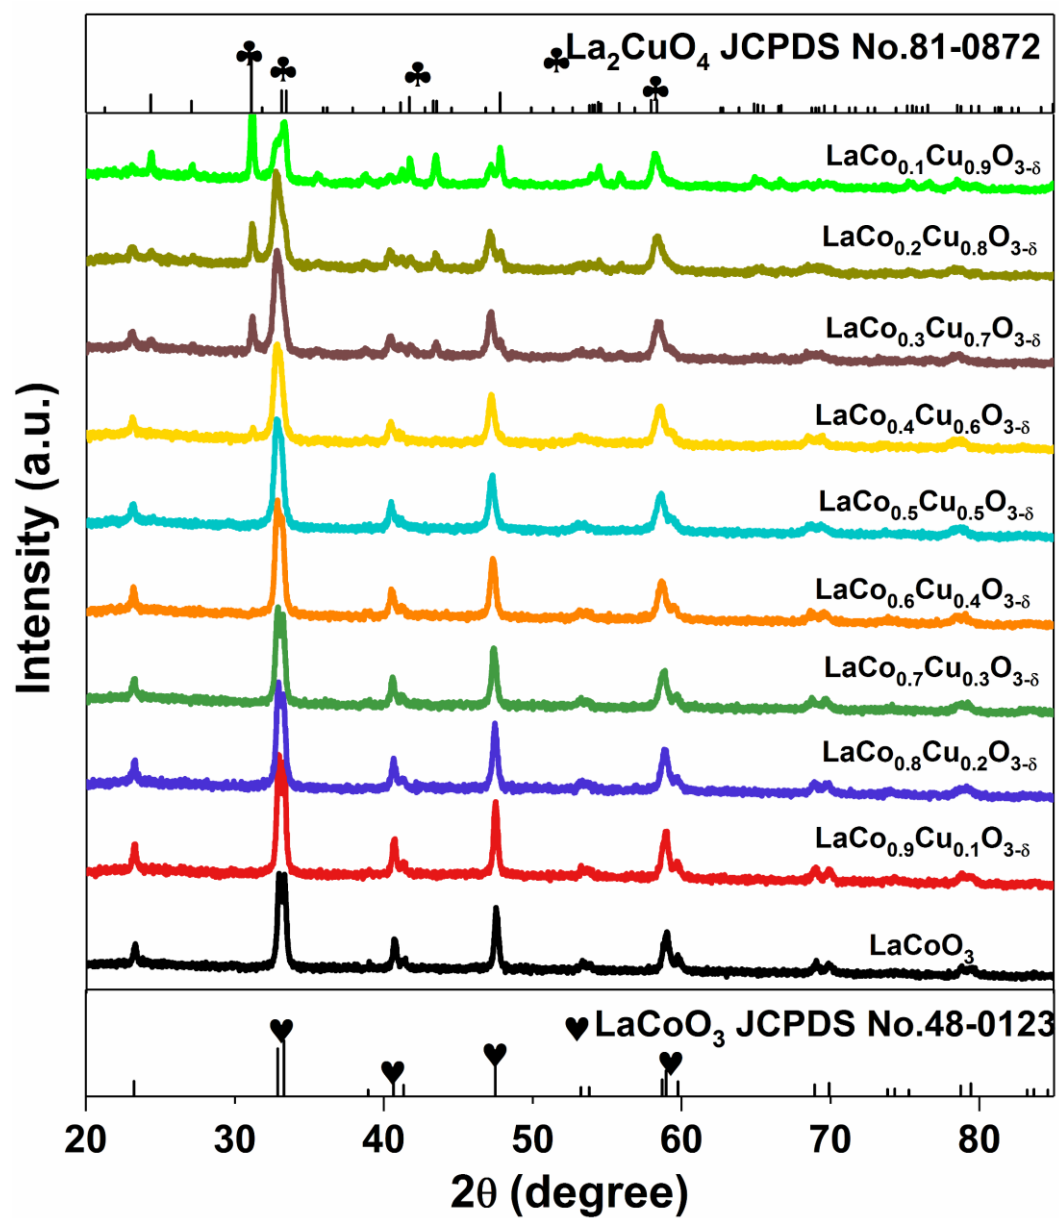

Figure S1. The XRD patterns of different copper doping on  $\text{LaCoO}_3$

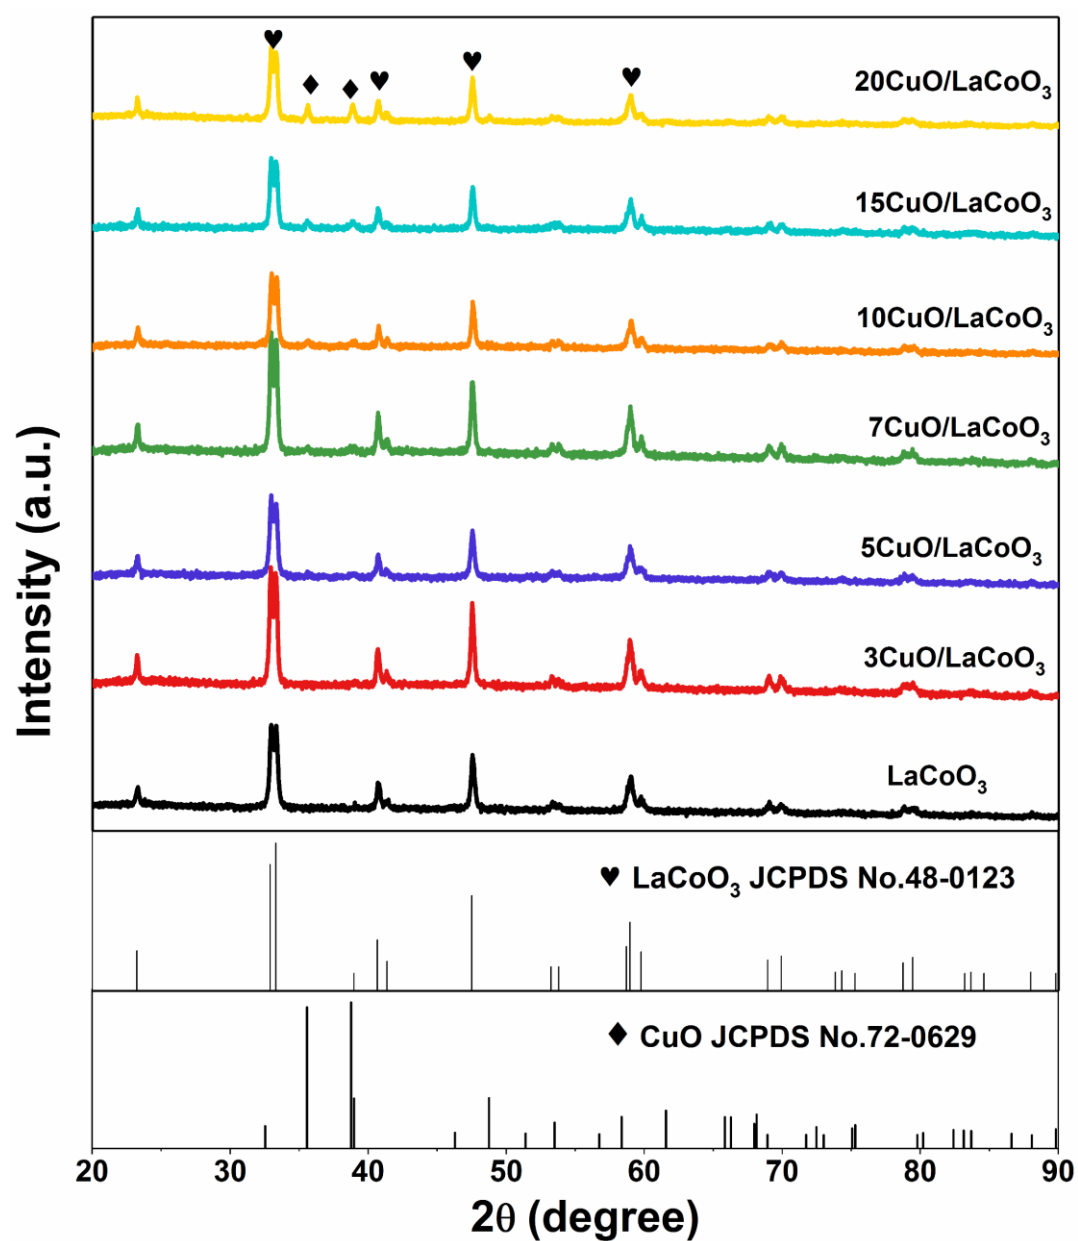

Figure S2. The XRD patterns of different copper oxide loading on  $\text{LaCoO}_3$

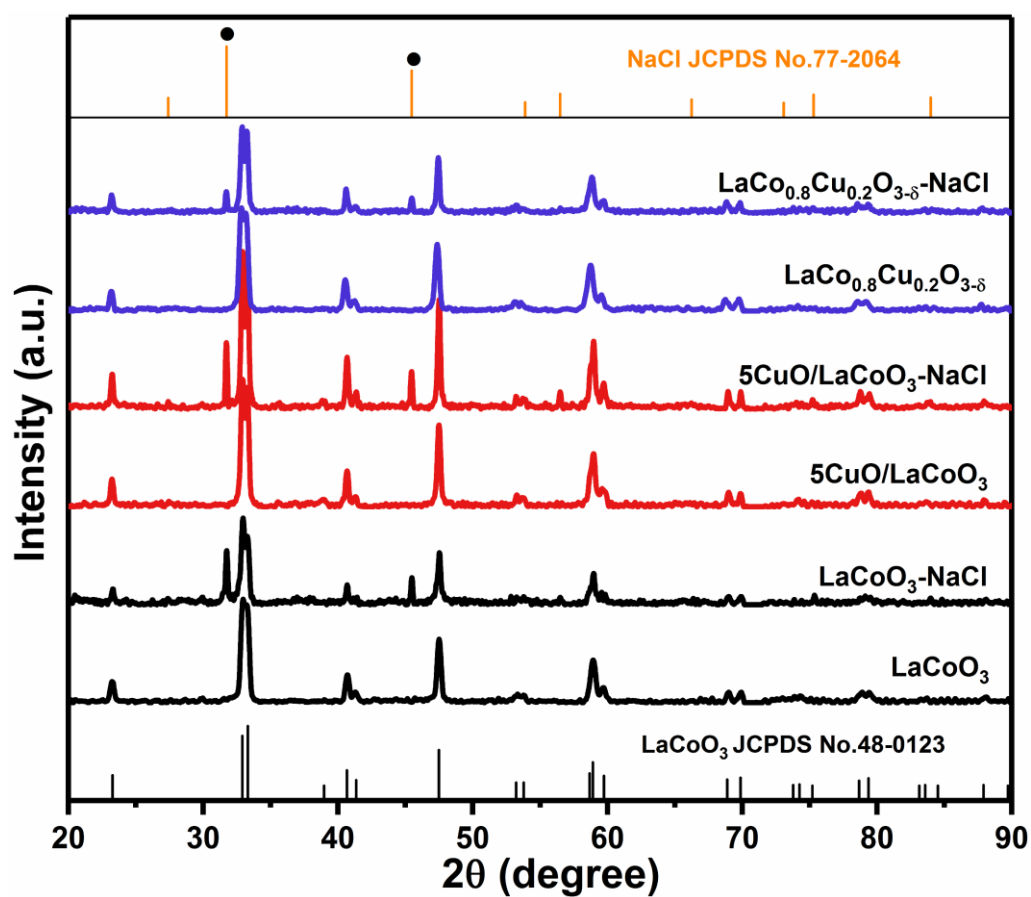

Figure S3. The XRD patterns of representative samples with and without NaCl modification.  
(The concentration of NaCl solution is 0.0256 M)

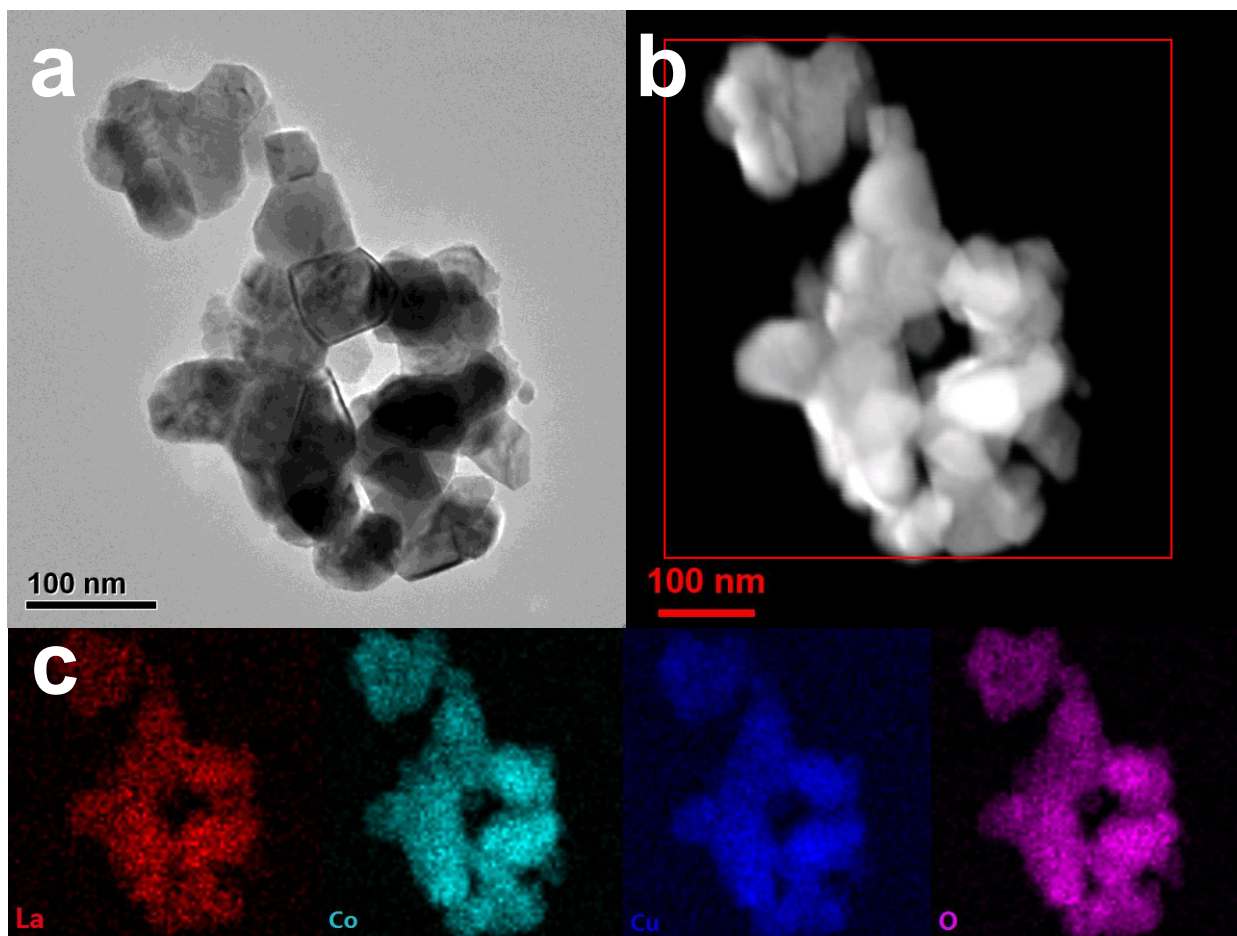

Figure S4. (a) Representative TEM image and (b-c) corresponding EDX elemental maps of  $\text{LaCo}_{0.8}\text{Cu}_{0.2}\text{O}_{3-\delta}\text{-NaCl}$  sample (Only describing La, Co, Cu, and O since NaCl is hardly to be detected after ultrasonic process for  $\text{LaCo}_{0.8}\text{Cu}_{0.2}\text{O}_{3-\delta}$  sample promoted with NaCl).

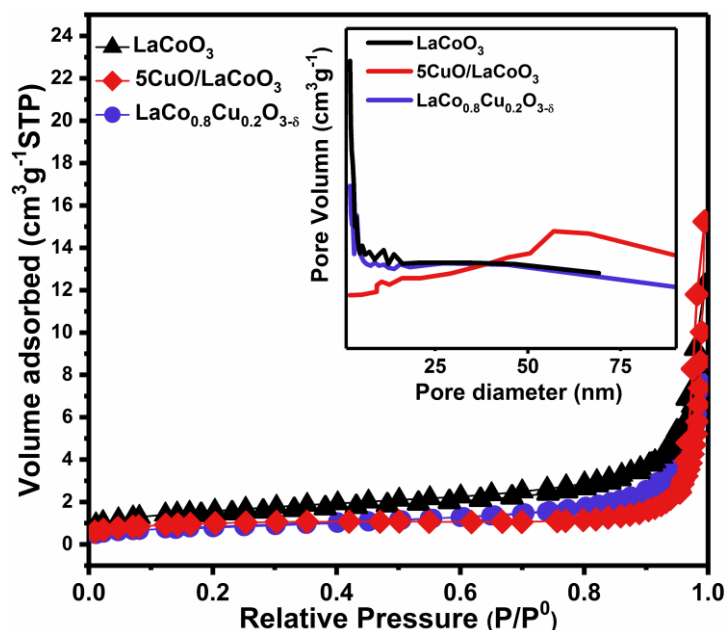

Figure S5. N<sub>2</sub> adsorption/desorption isotherms with insert of pore size distribution of representative samples;

Cu doping LaCoO<sub>3</sub> perovskites exhibit poor N<sub>2</sub>-adsorption ability as compared to pure LaCoO<sub>3</sub>, as well as the decrease of specific surface area (only 3.033 m<sup>2</sup>g<sup>-1</sup>). Since the surface area of LaCoO<sub>3</sub> synthesized by chemical sol-gel method is proven to be relatively low (5.649 m<sup>2</sup>g<sup>-1</sup> in this study), LaCo<sub>0.8</sub>Cu<sub>0.2</sub>O<sub>3-δ</sub> perovskites remain physically inert, indicating its similar textural properties to LaCoO<sub>3</sub> perovskites prepared by conventional chemical method. This was also confirmed by pore diameter distribution curves inside. Even addition with CuO, the materials still show low surface area and weak adsorption but more average pore diameter distribution owing to formation of CuO aggregates. These results demonstrated that perovskites materials in this study are nonporous or microporous and corresponding mainly to type II of the IUPAC classification.<sup>1</sup> Furthermore, the curves of pore diameter distribution of LaCoO<sub>3</sub> and LaCo<sub>0.8</sub>Cu<sub>0.2</sub>O<sub>3-δ</sub> are almost consistent which testify that both of these two samples possess a classical perovskite structure and hardly formation of CuO particles for the LaCo<sub>0.8</sub>Cu<sub>0.2</sub>O<sub>3-δ</sub> sample, matching well with the results of XRD results.

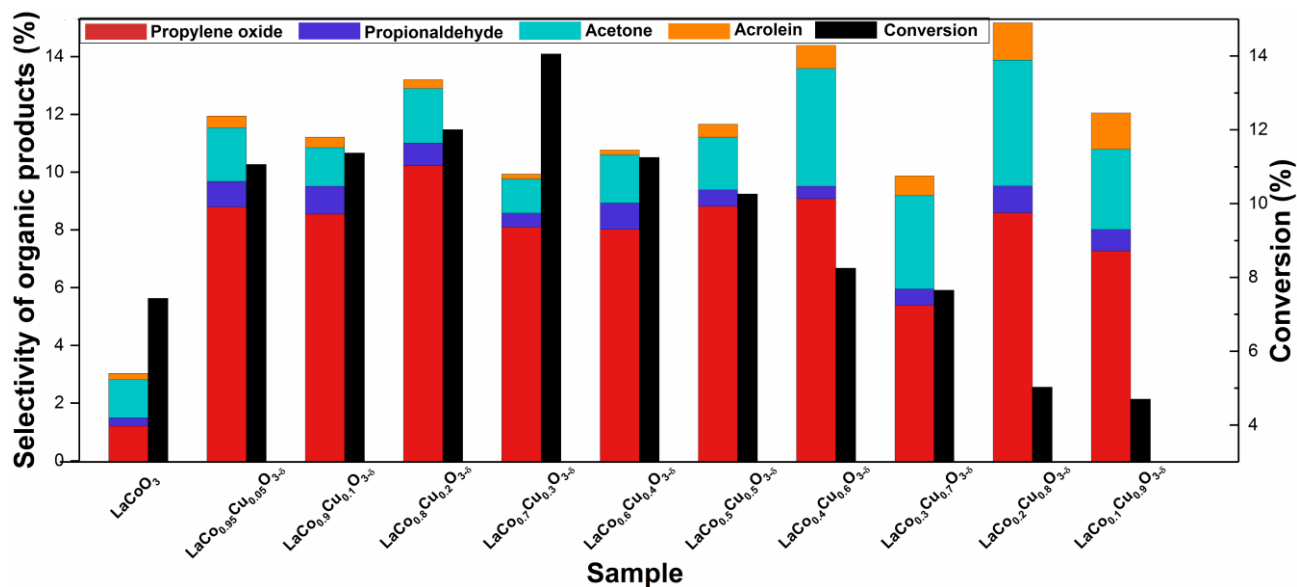

Figure S6. Distribution of organic products over  $\text{LaCo}_x\text{Cu}_{1-x}\text{O}_{3-\delta}$  catalysts and corresponding propylene conversion (all samples were modified with NaCl solution with a concentration of 0.0256 M).

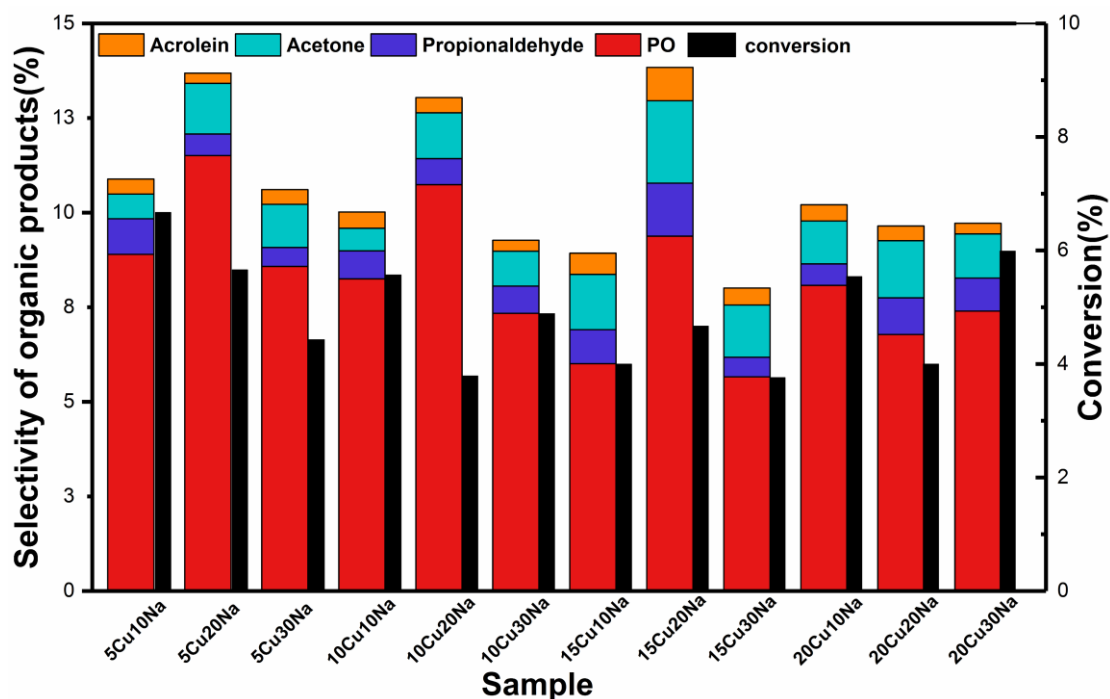

Figure S7. Distribution of organic products over  $x\text{CuO}/\text{LaCoO}_3\text{-yNaCl}$  catalysts and corresponding propylene conversion (where x represents the nominal content (wt. %) of copper on the  $\text{LaCoO}_3$ , y represents the mass ratio of NaCl to  $x\text{CuO}/\text{LaCoO}_3$  used in NaCl solution, corresponding to 0.0128-0.0384 M).



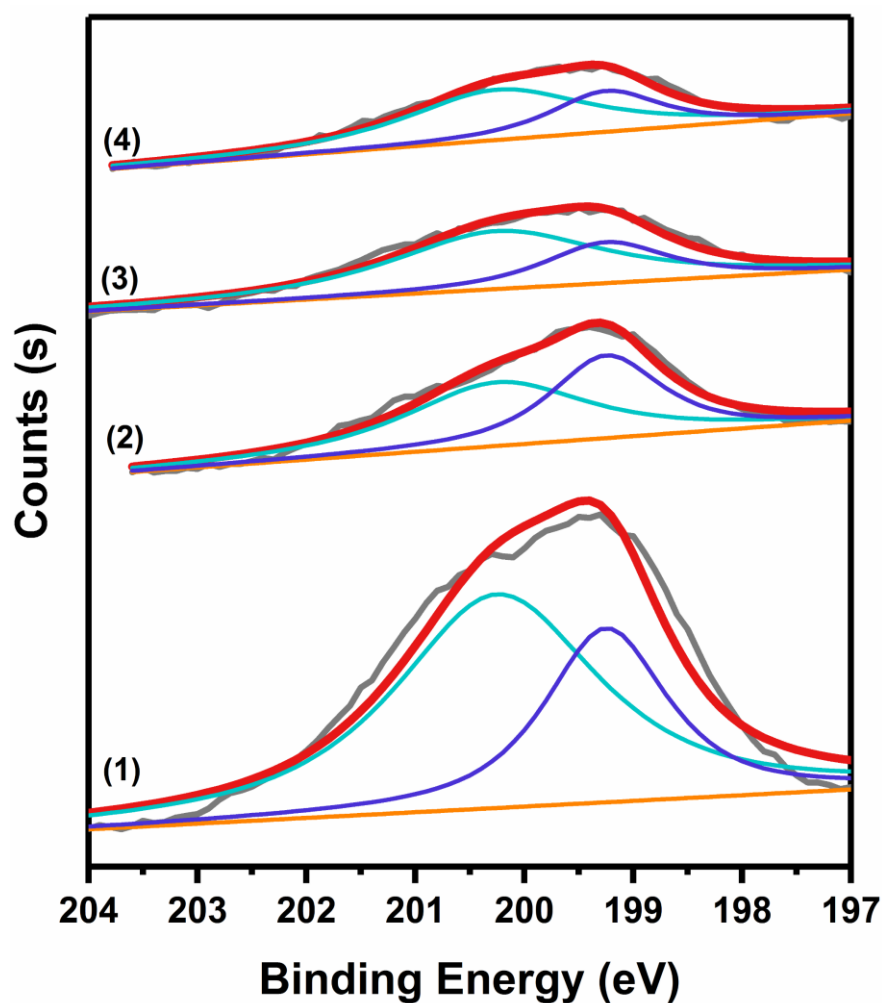

Figure S8. XPS spectrum of Cl 2p for LaCoO<sub>3</sub>-based catalysts modified with NaCl, (1) fresh 5CuO/LaCoO<sub>3</sub>-NaCl; (2) spent 5CuO/LaCoO<sub>3</sub>-NaCl; (3) fresh LaCo<sub>0.8</sub>Cu<sub>0.2</sub>O<sub>3-δ</sub>-NaCl; (4) fresh LaCo<sub>0.8</sub>Cu<sub>0.2</sub>O<sub>3-δ</sub>-NaCl; The concentration of NaCl solution used is 0.0256 M.

XPS of Cl 2p of representative samples were further conducted to illustrate the difference of the Cl variation of 5CuO/LaCoO<sub>3</sub>-NaCl and LaCo<sub>0.8</sub>Cu<sub>0.2</sub>O<sub>3-δ</sub>-NaCl during the DEP process. But only the data of two kinds of samples (fresh and spent one) were recorded in this study. Cl variation were calculated by the ratio of deconvolution peaks.<sup>2,3</sup> More information can be obtained in Table S3.

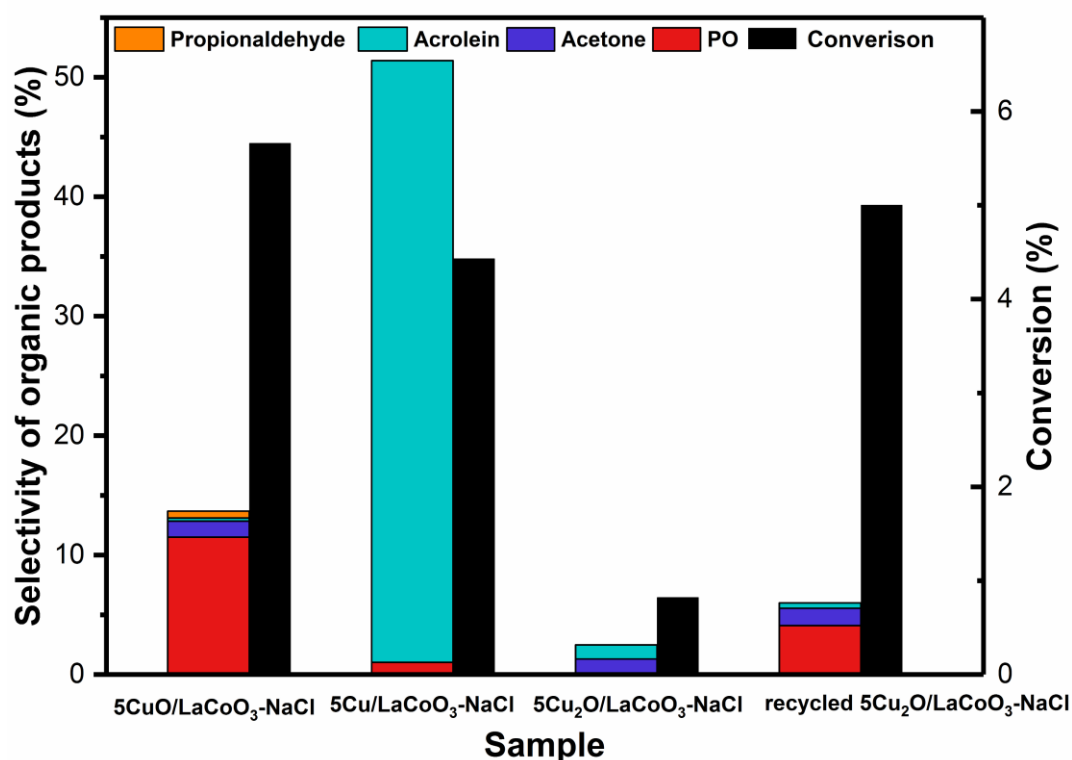

Figure S9. Distribution of organic products over different copper species supported on/LaCoO<sub>3</sub>-NaCl catalysts and corresponding propylene conversion (The concentration of NaCl solution is 0.0256 M)

Cu/LaCoO<sub>3</sub> is prepared by the H<sub>2</sub> reduction of 5CuO/LaCoO<sub>3</sub>, Cu<sub>2</sub>O/LaCoO<sub>3</sub> is prepared by a method mentioned in another work,<sup>4</sup> but LaCoO<sub>3</sub> is added in the precursor solution in advance. But the existence of Cu<sup>+</sup>, Cu<sup>0</sup> in 5CuO/LaCoO<sub>3</sub>-NaCl catalysts and the oxidation of Cu species in low valence in 5Cu/LaCoO<sub>3</sub>-NaCl and 5Cu<sub>2</sub>O/LaCoO<sub>3</sub>-NaCl catalysts can not be ignored. The catalytic performance is evaluated under the same reaction conditions.

Table S1. Textural properties of the samples synthesized in this study and previously relevant reports for DEP reaction.

| Samples                                                                          | Surface area (m <sup>2</sup> /g) <sup>a</sup> | Pore volume (cm <sup>3</sup> /g) <sup>b</sup> | Average Pore size (nm) <sup>c</sup> | Ref.      |
|----------------------------------------------------------------------------------|-----------------------------------------------|-----------------------------------------------|-------------------------------------|-----------|
| LaCoO <sub>3</sub>                                                               | 5.649                                         | 0.019                                         | 13.04                               | This work |
| CuO/LaCoO <sub>3</sub> -NaCl                                                     | 3.519                                         | 0.012                                         | 38.62                               | This work |
| LaCo <sub>0.8</sub> Cu <sub>0.2</sub> O <sub>3</sub> -NaCl                       | 3.033                                         | 0.014                                         | 17.60                               | This work |
| Ag/TiO <sub>2</sub> rutile-NaCl                                                  | 1.5                                           | 0.014                                         | -                                   | 1         |
| Ag/CaCO <sub>3</sub> -NaCl                                                       | 0.9                                           | 0.010                                         | -                                   | 1         |
| CuO <sub>x</sub> /SiO <sub>2</sub> -NaNO <sub>3</sub>                            | 465                                           | 1.02                                          | 7.0                                 | 5         |
| Cu-modified MoO <sub>3</sub> -Bi <sub>2</sub> SiO <sub>5</sub> /SiO <sub>2</sub> | 219                                           | 0.15                                          | 3.43                                | 6         |
| WO <sub>x</sub> /Ce <sub>0.05</sub> Zr <sub>0.95</sub> O <sub>2</sub>            | 12.3                                          | -                                             | 8.3                                 | 7         |

<sup>a</sup> Calculated by the BET (Brunauer–Emmett–Teller) equation

<sup>b</sup> At P/P<sub>0</sub> =0.99

<sup>c</sup> Obtained from BJH pore size distribution curves

Table S2. Catalytic performance of the samples synthesized in this study and previous works on DEP reaction with molecular oxygen.

| No. | Catalyst                                        | Conv.(%) | Sel.(%) | PO<br>yield<br>(%) | Temp.<br>(°C) | Flow rate<br>(mL/min) | Pressure<br>(MPa) | Ref. |
|-----|-------------------------------------------------|----------|---------|--------------------|---------------|-----------------------|-------------------|------|
| 1   | Cu/SiO <sub>2</sub>                             | 1.3      | 3       | 0.039              | 275           | 50                    | 0.1               | 8    |
| 2   | NaCl-VCe <sub>0.8</sub><br>Cu <sub>0.2</sub>    | 0.19     | 43      | 0.082              | 250           | /                     | 0.1               | 9    |
| 3   | CuO <sub>x</sub> /SBA-15                        | 1        | 10      | 0.1                | 275           | 60                    | 0.1               | 10   |
| 4   | K <sup>+</sup> -CuO <sub>x</sub> /SBA-<br>15    | 0.48     | 30      | 0.15               | 275           | 60                    | 0.1               | 10   |
| 5   | Rhombic<br>dodecahedra<br>Cu <sub>2</sub> O     | 0.8      | 13      | 0.10               | 250           | 50                    | 0.1               | 11   |
| 6   | Cubic Cu <sub>2</sub> O                         | 0.8      | 10      | 0.08               | 225           | 50                    | 0.1               | 11   |
| 7   | Octahedral<br>Cu <sub>2</sub> O                 | 0.67     | 3       | 0.020              | 200           | 50                    | 0.1               | 11   |
| 8   | Ag-MoO <sub>3</sub> /ZrO <sub>2</sub>           | 0.6      | 58      | 0.35               | 350           | 62.5                  | 0.1               | 12   |
| 9   | MoAg/LaSiO <sub>2</sub> -<br>NaCl               | 11.4     | 17.0    | 1.94               | 400           | 100                   | 0.1               | 13   |
| 10  | Ag-CaCO <sub>3</sub>                            | 10       | 5       | 0.5                | 220           | 30                    | 0.3               | 14   |
| 11  | NaCl-Ag-<br>CaCO <sub>3</sub>                   | 3        | 45      | 1.35               | 260           | 30                    | 0.3               | 15   |
| 12  | Ag <sub>3</sub> /Al <sub>2</sub> O <sub>3</sub> | /        | 90      | /                  | 100           | 30                    | 0.13              | 16   |

|    |                                                                  |      |      |       |     |    |     |               |
|----|------------------------------------------------------------------|------|------|-------|-----|----|-----|---------------|
| 13 | Ag-CuCl <sub>2</sub>                                             | 1.6  | 31   | 0.50  | 350 | 60 | 0.1 | <sup>17</sup> |
| 14 | Ni-Ag                                                            | 1.7  | 11.8 | 0.20  | 150 | 30 | 0.3 | <sup>18</sup> |
| 15 | CuO <sub>x</sub> /SiO <sub>2</sub> -<br>NaNO <sub>3</sub>        | 4    | 13   | 0.52  | 350 | 30 | 0.1 | <sup>5</sup>  |
| 16 | Ni <sub>1</sub> Ag <sub>0.4</sub> /SBA-<br>15                    | /    | 70.7 | /     | 220 | 20 | 0.1 | <sup>19</sup> |
| 17 | K <sub>0.02</sub> Fe <sub>0.005</sub> SiO <sub>2</sub>           | 1.4  | 65   | 0.91  | 450 | /  | /   | <sup>20</sup> |
| 18 | Ag-Cu-<br>Cl/BaCO <sub>3</sub>                                   | 1.2  | 83.7 | 1.00  | 200 | 50 | 0.1 | <sup>21</sup> |
| 19 | RuO <sub>2</sub> -CuO-<br>TeO <sub>2</sub> /SiO <sub>2</sub>     | 0.35 | 47   | 0.16  | 269 | 33 | 0.1 | <sup>22</sup> |
| 20 | Ag-Na/CaCO <sub>3</sub>                                          | 11.2 | 8.2  | 0.92  | 350 | 10 | 0.2 | <sup>23</sup> |
| 21 | Ag-ZrO <sub>2</sub> -NaCl                                        | 13   | 6.1  | 0.79  | 220 | 50 | 0.1 | <sup>1</sup>  |
| 22 | Ag-CuCl <sub>2</sub><br>/BaCO <sub>3</sub>                       | 1.3  | 71.2 | 0.93  | 200 | 50 | 0.1 | <sup>24</sup> |
| 23 | Rhombic<br>dodecahedra Cl-<br>Cu <sub>2</sub> O                  | 1.0  | 63   | 0.63  | 200 | 50 | 0.1 | <sup>2</sup>  |
| 24 | Rhombic<br>dodecahedra Cl-<br>Cu <sub>2</sub> O                  | 0.05 | >95  | 0.048 | 150 | 50 | 0.1 | <sup>2</sup>  |
| 25 | CuO/LaCoO <sub>3</sub> -<br>NaCl                                 | 5.7  | 11.5 | 0.66  | 250 | 30 | 0.1 | This<br>work  |
| 26 | LaCo <sub>0.8</sub> Cu <sub>0.2</sub> O <sub>3</sub> -<br>δ-NaCl | 12   | 10.8 | 1.30  | 250 | 30 | 0.1 | This<br>work  |

Table S3. XPS and AES data (chemical states) of all LaCoO<sub>3</sub>-based catalysts modified with NaCl (the concentration of NaCl solution is 0.0256 M)

| Samples                                                                   | $\text{Cu}^{2+}/(\text{Cu}^{+} + \text{Cu}^0)^a$ | $\text{Cu}^0/\text{Cu}^{+b}$ | $\text{O}_{\text{ele}}/\text{O}_{\text{latt}}^a$ | Ratio of deconvolution peaks for Cl 2p <sup>a</sup> | Cl variation (%) <sup>a</sup> |
|---------------------------------------------------------------------------|--------------------------------------------------|------------------------------|--------------------------------------------------|-----------------------------------------------------|-------------------------------|
| Fresh<br>5CuO/LaCoO <sub>3</sub> -<br>NaCl                                | 4.85                                             | 0.038                        | 3.01                                             | 2.03                                                | 37.9                          |
| Spent<br>5CuO/LaCoO <sub>3</sub> -<br>NaCl                                | 5.16                                             | 0.42                         | 2.27                                             | 1.26                                                |                               |
| Fresh<br>LaCo <sub>0.8</sub> Cu <sub>0.2</sub> O <sub>3-δ</sub> -<br>NaCl | 3.13                                             | 1.41                         | 3.09                                             | 2.40                                                | 15.4                          |
| Spent<br>LaCo <sub>0.8</sub> Cu <sub>0.2</sub> O <sub>3-δ</sub> -<br>NaCl | 3.15                                             | 3.53                         | 2.34                                             | 2.03                                                |                               |

<sup>a</sup> calculated by XPS spectrum

<sup>b</sup> calculated by AES spectrum

The ratio of  $\text{Cu}^{2+}/(\text{Cu}^{+} + \text{Cu}^0)$  is based on the peak area of XPS spectrum of Cu 2p. The ratio of  $\text{Cu}^0/\text{Cu}^{+}$  is based on the peak area of AES spectrum of Cu LMM.

## REFERENCES

- (1) Charisteidis, I. D.; Triantafyllidis, K. S., Propylene epoxidation by molecular oxygen using supported silver catalysts: Effect of support type, preparation method and promotion with alkali chloride and/or steam. *Catalysis Today* **2020**, *355*, 654-664.
- (2) Zhan, C.; Wang, Q.; Zhou, L.; Han, X.; Wanyan, Y.; Chen, J.; Zheng, Y.; Wang, Y.; Fu, G.; Xie, Z.; Tian, Z. Q., Critical roles of doping Cl on Cu<sub>2</sub>O nanocrystals for direct epoxidation of propylene by molecular oxygen. *Journal of the American Chemical Society* **2020**, *142*, 14134-14141.
- (3) Wang, Q.; Zhan, C.; Zhou, L.; Fu, G.; Xie, Z., Effects of Cl<sup>-</sup> on Cu<sub>2</sub>O nanocubes for direct epoxidation of propylene by molecular oxygen. *Catalysis Communications* **2020**, *135*, 1-14.
- (4) Zhan, G., Synthetic architecture of integrated nanocatalysts with controlled spatial distribution of metal nanoparticles. *Chemical Engineering Journal* **2019**, *355*, 320-334.
- (5) Teržan, J.; Djinović, P.; Zavašnik, J.; Arčon, I.; Žerjav, G.; Spreitzer, M.; Pintar, A., Alkali and earth alkali modified CuO<sub>x</sub>/SiO<sub>2</sub> catalysts for propylene partial oxidation: What determines the selectivity? *Applied Catalysis B: Environmental* **2018**, *237*, 214-227.
- (6) Wang, Z.; Gao, A.; Chen, P.; Hu, H.; Huang, Q.; Chen, X., The construction of Mo<sub>6-8</sub>O<sub>3-x</sub>-supported catalyst for low-temperature propylene gas-phase epoxidation by Cu modification. *Journal of Catalysis* **2018**, *368*, 120-133.
- (7) Lee, E. J.; Lee, J.; Lee, M.; Min, H.-K.; Park, S.; Heui Kim, D., Propylene epoxidation by oxygen over tungsten oxide supported on ceria-zirconia. *Molecular Catalysis* **2019**, *467*, 111-119.
- (8) Vaughan, O.; Kyriakou, G.; Macleod, N.; Tikhov, M.; Lambert, R., Copper as a selective catalyst for the epoxidation of propene. *Journal of Catalysis* **2005**, *236* (2), 401-404.
- (9) Lu, J.; Luo, M.; Lei, H.; Bao, X.; Li, C., Epoxidation of propylene on NaCl-modified VCe<sub>1-x</sub>Cu<sub>x</sub> oxide catalysts with direct molecular oxygen as the oxidant. *Journal of Catalysis* **2002**, *211* (2), 552-555.
- (10) Zhu, W.; Zhang, Q.; Wang, Y., Cu(I)-catalyzed epoxidation of propylene by molecular oxygen. *Journal of Physical Chemistry C* **2008**, *112*, 7731-7734.
- (11) Hua, Q.; Cao, T.; Gu, X. K.; Lu, J.; Jiang, Z.; Pan, X.; Luo, L.; Li, W. X.; Huang, W., Crystal-plane-controlled selectivity of Cu<sub>2</sub>O catalysts in propylene oxidation with molecular oxygen. *Angewandte Chemie International Edition* **2014**, *53* (19), 4856-61.
- (12) Jin, G.; Lu, G.; Guo, Y.; Guo, Y.; Wang, J.; Kong, W.; Liu, X., Effect of preparation condition on performance of Ag-MoO<sub>3</sub>/ZrO<sub>2</sub> catalyst for direct epoxidation of propylene by molecular oxygen. *Journal of Molecular Catalysis A: Chemical* **2005**, *232* (1-2), 165-172.
- (13) Abdel Dayem, H. M.; Al-Shihry, S. S.; Hassan, S. A., Can lanthanum doping enhance catalytic performance of silver in direct propylene epoxidation over NaMoAg/SiO<sub>2</sub>? *Journal of Rare Earths* **2019**, *37* (5), 500-507.
- (14) Lu, J.; Bravosuaréz, J.; Takahashi, A.; Haruta, M.; Oyama, S., In situ UV-vis studies of the effect of particle size on the epoxidation of ethylene and propylene on supported silver catalysts with molecular oxygen. *Journal of Catalysis* **2005**, *232* (1), 85-95.
- (15) Lu, J.; Bravo-Suárez, J. J.; Haruta, M.; Oyama, S. T., Direct propylene epoxidation

- over modified Ag/CaCO<sub>3</sub> catalysts. *Applied Catalysis A: General* **2006**, 302 (2), 283-295.
- (16) Lei, Y.; Mehmood, F.; Lee, S., Increased silver activity for direct propylene epoxidation via subnanometer size effects. *Science* **2010**, 328, 224-228.
- (17) Luo, M.; Lu, J.; Li, C., Epoxidation of propylene over Ag-CuCl catalysts using air as the oxidant. *Catalysis Letters* **2003**, 86, 43-49.
- (18) Takahashi, A.; Hamakawa, N.; Nakamura, I.; Fujitani, T., Effects of added 3d transition-metals on Ag-based catalysts for direct epoxidation of propylene by oxygen. *Applied Catalysis A: General* **2005**, 294 (1), 34-39.
- (19) Yu, B.; Ayvalı, T.; Raine, E.; Li, T.; Li, M. M.-J.; Zheng, J.; Wu, S.; Bagabas, A. A.; Tsang, S. C. E., Enhanced propylene oxide selectivity for gas phase direct propylene epoxidation by lattice expansion of silver atoms on nickel nanoparticles. *Applied Catalysis B: Environmental* **2019**, 243, 304-312.
- (20) García-Aguilar, J.; Cazorla-Amorós, D.; Berenguer-Murcia, Á., K<sup>+</sup> and Ca<sup>2+</sup> promoted ferrosilicates for the gas-phase epoxidation of propylene with O<sub>2</sub>. *Applied Catalysis A: General* **2017**, 538, 139-147.
- (21) Zhang, Q.; Guo, Y.; Zhan, W.; Guo, Y.; Wang, L.; Wang, Y.; Lu, G., Gas-phase epoxidation of propylene by molecular oxygen over Ag-Cu-Cl/BaCO<sub>3</sub> catalyst: Effects of Cu and Cl loadings. *Chinese Journal of Catalysis* **2017**, 38 (1), 65-72.
- (22) Seubsai, A.; Uppala, C.; Tiencharoenwong, P.; Chukeaw, T.; Chareonpanich, M.; Zohour, B.; Noon, D.; Senkan, S., High stability of ruthenium–copper-based catalysts for epoxidation of propylene. *Catalysis Letters* **2017**, 148 (2), 586-600.
- (23) Shigeru, S.; Yasuhiro, S.; Tomoyasu, O.; Naotaka, S.; Naohiro, S.; Masahiro, K.; Nobuhiro, K., Gas-phase epoxidation of propylene to propylene oxide on a supported catalyst modified with various dopants. *Catalysts* **2019**, 9 (8), 638-640.
- (24) Zhang, Q.; Chai, G.; Guo, Y.; Zhan, W.; Guo, Y.; Wang, L.; Wang, Y.; Lu, G., Gas-phase epoxidation of propylene by molecular oxygen over Ag-CuCl<sub>2</sub>/BaCO<sub>3</sub> catalyst with low CuCl<sub>2</sub> doping: Catalytic performance, deactivation and regeneration. *Journal of Molecular Catalysis A: Chemical* **2016**, 424, 65-76.
